# Supplementary material for: A cyclodextrin-phenylboronic acid cross-linked hydrogel with drug hosting, self-healing and pH-sensitive properties for sustained drug release
Source: Royal Society of Chemistry journal article supplement (doi:10.1039/d1nj01228b), 2021-01-01
Supplement: d1nj01228b1.pdf [file d1nj01228b1.pdf]

## Supporting Information

### **Cyclodextrin-phenylboronic acid cross-linked hydrogel with drug hosting, self-healing and pH-sensitive for sustained drug release**

Daijun Chen,<sup>1</sup> Guanglei Ren,<sup>2</sup> Xiaoli Zhao,<sup>1</sup> Jinni Luo,<sup>1</sup> Huanxia Wang,<sup>1</sup> Pengxiang Jia<sup>1\*</sup>

*<sup>1</sup>Key Laboratory of Synthetic and Natural Functional Molecule of Ministry of Education, College of Chemistry and Materials Science, Northwest University, Xi'an, Shanxi 710127, China*

*<sup>2</sup>Miracll Chemicals Co., Ltd., Yantai, Shandong, 264006, China*

### **Corresponding Author**

pxjia@nwu.edu.cn (P. Jia)

**Table. S1.** Chemical shift  $\delta$  and  $\Delta\delta$  of protons of  $\beta$ -CD and  $\beta$ -CD/SA inclusion complex.

|                                  | H1   | H2   | H3   | H4   | H5   | H6   | Ar-H     |
|----------------------------------|------|------|------|------|------|------|----------|
| $\delta_{\beta\text{-CD}}$ (ppm) | 5.0  | 3.57 | 3.89 | 3.51 | 3.59 | 3.8  | ---      |
| $\delta_{\text{complex}}$ (ppm   | 4.88 | 3.44 | 3.75 | 3.4  | 3.47 | 3.69 | 6.82-7.7 |
| )                                |      |      |      |      |      |      |          |
| $\Delta\delta$ (ppm)             | 0.12 | 0.13 | 0.14 | 0.11 | 0.12 | 0.11 |          |
